# Supplementary material
Source: MDPI journal article supplement (https://www.mdpi.com/2076-3263/10/4/138)
Supplement: s1 [file s1]

## Sheet: Table S1
Intact Permeability Measured at PE = 3 Mpa						Permeability Interpolated to PE = 3 Mpa					Fractured Permeability Measured to PE = 1 Mpa					Intact Permeability Measured to PE = 1 Mpa
Sample	Lithology	Porosity	Peremability (3 Mpa)	UCS (Mpa)		Sample	Lithology	Porosity	Peremability (1 Mpa)		Sample	Lithology	Porosity	Peremability (1 Mpa)		Sample	Lithology	Porosity	Peremability (1 Mpa)
WI 2-1g	Lava	13.9552	4.83 × 10-18	74.8188		WI20T3	Intact Lava	7.01264	9.00 × 10-19		WI20T1	Lava	9.00929	1.50 × 10-12		WI20T1	Lava	9.00929	2.41 × 10-17
WI 2-1s	Lava	19.0299	8.89 × 10-17			WI20T3	Fractured Lava	7.01264	2.18 × 10-12		WI20T2	Lava	7.11958	1.45 × 10-12		WI20T2	Lava	7.11958	1.23 × 10-17
WI 2-1u	Lava	18.0746	3.29 × 10-17			WI 1-2c1	Fractured Altered Lava	10.0825	5.46 × 10-13		WI20T3	Lava	7.01264	2.54 × 10-12		WI20T3	Lava	7.01264	2.94 × 10-18
WI 2-2	Lava	6.13692	1.12 × 10-16	82.9038		WI 2-1j1	Fractured Altered Lava	17.439	1.66 × 10-13		WI20T4	Lava	8.06498	2.61 × 10-12		WI20T4	Lava	8.06498	5.76 × 10-18
WI 2-2c	Lava	5.57178	2.78 × 10-18								WI20T5	Lava	5.67745	1.82 × 10-12		WI20T5	Lava	5.67745	4.10 × 10-18
WI 2-2d	Lava	7.62725	8.15 × 10-19								WI20T6	Lava	10.6491	2.26 × 10-12		WI20T6	Lava	10.6491	1.91 × 10-17
WI 2-2f	Lava	4.75414	1.36 × 10-18								WI20T7	Lava	7.40231	2.81 × 10-12		WI20T7	Lava	7.40231	6.26 × 10-18
											WI20T8	Lava	7.51965	1.96 × 10-12		WI20T8	Lava	7.51965	6.55 × 10-18
161-8a	Altered Lava	22.7992	2.73 × 10-15	21.34							WI20T9	Lava	8.9246	2.05 × 10-12		WI20T9	Lava	8.9246	1.50 × 10-17
161-8c	Altered Lava	18.3921	2.68 × 10-17								WI 1-2c1	Altered Lava	10.0825	1.47 × 10-12
161-8d	Altered Lava	24.3459	8.48 × 10-18	26.6567							WI 1-2c2	Altered Lava	10.0825	5.07 × 10-13
161-8e	Altered Lava	24.4352	1.29 × 10-17								WI 2-1i1	Altered Lava	21.12	4.67 × 10-13
161-8f	Altered Lava	21.4447	4.91 × 10-17								WI 2-1i2	Altered Lava	21.12	4.39 × 10-13
WI 1-2a	Altered Lava	17.5513	3.62 × 10-16	18.8817							WI 2-1j1	Altered Lava	17.439	3.85 × 10-13
WI 1-2b	Altered Lava	23.0378	9.12 × 10-17								WI 3-5b1	Hydrothermal Breccia	21.7875	2.46 × 10-13
WI 1-2c	Altered Lava	10.0825	1.20 × 10-16								WI 3-5b2	Hydrothermal Breccia	21.7875	1.09 × 10-12
WI 1-2d	Altered Lava	7.70066	2.12 × 10-17
WI 1-2e	Altered Lava	10.2985	4.19 × 10-19
WI 1-2f	Altered Lava	13.4571	1.15 × 10-16
WI 1-2i	Altered Lava	6.66186	2.98 × 10-18
WI 1-2k	Altered Lava	6.53602	7.27 × 10-18	71.1679
WI 1-2l	Altered Lava	22.6009	1.20 × 10-15	24.0006
WI 1-2n	Altered Lava	5.50044	4.72 × 10-18
WI 2-1c	Altered Lava	23.2064	1.50 × 10-16
WI 2-1e	Altered Lava	21.3119	6.10 × 10-16
WI 2-1f	Altered Lava	23.7871	6.48 × 10-17
WI 2-1i	Altered Lava	21.117	4.24 × 10-16
WI 2-1k	Altered Lava	15.4665	9.22 × 10-16	8.20863
WI 2-1l	Altered Lava	18.6601	2.15 × 10-15	48.5908
WI 2-1n	Altered Lava	12.0101	6.65 × 10-17
WI 2-1t	Altered Lava	16.809	2.04 × 10-16
WI 2-3c	Altered Lava	45.5985	2.90 × 10-16
WI 2-4ab	Altered Lava	10.5914	3.26 × 10-17	12.5687
WI 3-2a	Altered Lava	11.1416	2.69 × 10-17	44.6592
WI 3-2b	Altered Lava	11.6008	1.17 × 10-17
WI 3-2e	Altered Lava	16.4678	2.89 × 10-16
WI 3-2f	Altered Lava	12.4039	2.91 × 10-17
WI 3-3	Altered Lava	21.3758	6.09 × 10-17
WI 3-3c	Altered Lava	25.1369	2.90 × 10-16
WI 3-3d	Altered Lava	22.8054	2.39 × 10-18	56.5816
161-10a	Altered Ash Tuff	23.0137	6.79 × 10-17
161-10b	Altered Ash Tuff	24.0193	6.36 × 10-17
161-10c	Altered Ash Tuff	25.2546	5.23 × 10-17
161-11a	Altered Ash Tuff	36.6791	1.67 × 10-16
161-22c	Altered Ash Tuff	30.7652	1.24 × 10-16
163-1a	Altered Ash Tuff	35.0262	3.93 × 10-15
WI 2-3	Altered Ash Tuff	55.1213	3.00 × 10-15
WI 2-3d	Altered Ash Tuff	43.1069	2.63 × 10-15	13.0522
WI 2-3e	Altered Ash Tuff	37.6502	2.16 × 10-15
161-7a	Sulphur Cemented Tuff	7.40706	3.85 × 10-17
161-7b	Sulphur Cemented Tuff	5.81019	3.47 × 10-17	26.9608
161-22a	Hydrothermal Breccia	34.6018	2.95 × 10-16	23.1209
161-22b	Hydrothermal Breccia	36.0868	3.94 × 10-16
163-2a	Hydrothermal Breccia	28.3564	9.61 × 10-16
163-2b	Hydrothermal Breccia	19.7528	3.50 × 10-18	32.781
163-2c	Hydrothermal Breccia	28.2707	1.68 × 10-17
163-2d	Hydrothermal Breccia	37.3757	3.19 × 10-16
WI 3-5	Hydrothermal Breccia	26.7461	2.51 × 10-15	32.3475
WI 3-5b	Hydrothermal Breccia	21.7875	6.96 × 10-17
WI 3-6b	Hydrothermal Breccia	27.3738	8.11 × 10-17
WI 3-6c	Hydrothermal Breccia	26.897	1.07 × 10-15

## Sheet: Table S2
		Lithology	Intact Lava	Intact Lava	Fractured Lava	Intact Altered Lava	Intact Altered Lava	Intact Altered Lava	Fractured Altered Lava	Fractured Altered Lava	Intact Altered Ash Tuff
		Sample	WI20	WI20T3	WI20T3	2-1i	2-3c	3-2e	2-1c1	2-1j1	WI21b
	Confining Pressure	1	1.03 × 10-16	1.22 × 10-18	2.54 × 10-12	-	-	-	1.47 × 10-12	3.85 × 10-13	6.85 × 10-15
		2	7.63 × 10-17	1.12 × 10-18	2.14 × 10-12	-	-	-	8.70 × 10-13	2.75 × 10-13	6.08 × 10-15
		3	-	-	-	4.24 × 10-16	1.50 × 10-15	2.89 × 10-16	-	-	-
		5	6.63 × 10-17	1.06 × 10-18	1.46 × 10-12	3.84 × 10-16	1.48 × 10-15	3.96 × 10-17	2.53 × 10-13	6.90 × 10-14	5.55 × 10-15
		10	5.32 × 10-17	8.70 × 10-19	9.51 × 10-13	3.54 × 10-16	1.46 × 10-15	2.52 × 10-17	2.88 × 10-14	1.47 × 10-14	5.21 × 10-15
		15	4.36 × 10-17	7.57 × 10-19	5.81 × 10-13	3.48 × 10-16	1.41 × 10-15	1.41 × 10-17	1.16 × 10-14	5.88 × 10-15	5.05 × 10-15
		20	3.62 × 10-17	6.85 × 10-19	3.90 × 10-13	3.42 × 10-16	1.40 × 10-15	9.85 × 10-18	5.71 × 10-15	2.92 × 10-15	4.94 × 10-15
		25	3.00 × 10-17	6.26 × 10-19	2.62 × 10-13	3.41 × 10-16	1.28 × 10-15	7.02 × 10-18	3.34 × 10-15	1.63 × 10-15	4.76 × 10-15
		30	2.39 × 10-17	5.45 × 10-19	1.87 × 10-13	3.26 × 10-16	1.12 × 10-15	4.88 × 10-18	2.12 × 10-15	1.51 × 10-15	4.73 × 10-15

## Sheet: Table S3
Intact Permeability Measured at PE = 3 Mpa
Sample	Lithology	Porosity	Peremability (3 Mpa)	UCS (Mpa)													Heap et al 2015 (JVGR)
WI 2-1g	Lava	13.9552	4.83 × 10-18	74.8188													Sample	Lith	Porosity	Q
WI 2-2	Lava	6.13692	1.12 × 10-16	82.9038													WI20	Lava	6.6	139.9
																	WI20	Lava	8	143.9
WI 2-4ab	Altered Lava	10.5914	3.26 × 10-17	12.5687													WI20	Lava	7.7	113
WI 1-2l	Altered Lava	22.6009	1.20 × 10-15	24.0006													WI20c	Lava	12.3	44.3
161-8d	Altered Lava	24.3459	8.48 × 10-18	26.6567													WI20	Lava	7.7	139
WI 1-2a	Altered Lava	17.5513	3.62 × 10-16	18.8817													WI20	Lava	1.6	153.5
WI 1-2k	Altered Lava	6.53602	7.27 × 10-18	71.1679													WI20c	Lava	15.3	66.9
WI 3-2a	Altered Lava	11.1416	2.69 × 10-17	44.6592													WI20	Lava	5.3	94.1
161-8a	Altered Lava	22.7992	2.73 × 10-15	21.34													WI20	Lava	5.9	138.4
WI 2-1k	Altered Lava	15.4665	9.22 × 10-16	8.20863													WI20	Lava	5.9	164.4
WI 2-1l	Altered Lava	18.6601	2.15 × 10-15	48.5908													WI20	Lava	5.9	211.1
WI 2-3d	Altered Lava	43.1069	2.63 × 10-15	13.0522													WI20	Lava	6.3	253.7
WI 3-3d	Altered Lava	22.8054	2.39 × 10-18	56.5816													WI21	Altered Ash Tuff	28.1	56
																	WI21	Altered Ash Tuff	29.8	55.3
161-22a	Hydrothermal Breccia	34.6018	2.95 × 10-16	23.1209													WI21	Altered Ash Tuff	29.8	71.2
WI 3-5	Hydrothermal Breccia	26.7461	2.51 × 10-15	32.3475													WI21b	Altered Ash Tuff	42	10.8
																	WI21b	Altered Ash Tuff	39.3	19.9
161-7b	Sulphur Cemented Tuff	5.81019	3.47 × 10-17	26.9608													WI21b	Altered Ash Tuff	41.1	8.8
																	WI21b	Altered Ash Tuff	39.5	13.4
163-2b	Altered Ash Tuff	19.7528	3.50 × 10-18	32.781													WI21b	Altered Ash Tuff	43.5	13
																	WI21b	Altered Ash Tuff	48.7	7.8
																	WI21b	Altered Ash Tuff	44.4	4.4
																	WI21b	Altered Ash Tuff	42.5	9.2
																	WI21b	Altered Ash Tuff	44.5	9.8
									*Grey symbols are Heap et al. 2015 data								WI21b	Altered Ash Tuff	41.1	14.1
									*Porosity (%) on x-axis , UCS (MPa) on y-axis								WI21b	Altered Ash Tuff	34.6	24.2
																	WI22	Altered Ash Tuff	47.2	2.9
																	WI22	Altered Ash Tuff	45.3	6.6
																	WI22	Altered Ash Tuff	46.5	6.6
																	WI22	Altered Ash Tuff	46.2	7.9
																	WI22	Altered Ash Tuff	46	5.1
																	WI22	Altered Ash Tuff	46.5	5.6
																	WI22	Altered Ash Tuff	44.9	6.5
																	WI22	Altered Ash Tuff	46.3	5.2
																	WI23	Altered Ash Tuff	37.1	9.8
																	WI23	Altered Ash Tuff	35.9	9.3
																	WI23	Altered Ash Tuff	39.2	8.4
																	WI24	Altered Ash Tuff	46.7	5.2
																	WI24	Altered Ash Tuff	46.3	6
																	WI24	Altered Ash Tuff	48.9	5.8
																	WI24	Altered Ash Tuff	47.3	4.8
																	WI24	Altered Ash Tuff	46.8	5.2
																	WI24	Altered Ash Tuff	46.4	4.6
